# Supplementary material for: Transcriptomic Analysis Reveals the High-Oleic Acid Feedback Regulating the Homologous Gene Expression of Stearoyl-ACP Desaturase 2 (SAD2) in Peanuts
Source: MDPI journal article supplement (doi:10.3390/ijms20123091), 2019-06-25
Supplement: s1 [file s1]

**Title:**

**Transcriptomic Analysis Reveals the High-oleic Acid  
Feedback Regulating the Homologous Gene Expression of  
Stearoyl-ACP Desaturase 2 (*SAD2*) in Peanut**

**Author names:**

Hao Liu<sup>1#</sup>, Jianzhong Gu<sup>2#</sup>, Qing Lu<sup>1</sup>, Haifen Li<sup>1</sup>, Yanbin Hong<sup>1</sup>, Xiaoping Chen<sup>1</sup>, Li Ren<sup>2</sup>, Li Deng<sup>2</sup>, Xuanqiang Liang<sup>1\*</sup>

# For co-first author, these authors contributed equally to this work.

\* For corresponding.

**Affiliations:**

<sup>1</sup> Crops Research Institute, Guangdong Academy of Agricultural Sciences, Guangdong Provincial Key Laboratory of Crop Genetic Improvement, South China Peanut Sub-Center of National Center of Oilseed Crops Improvement, Guangzhou, 510640, China.

<sup>2</sup> Peanut Research Institute, Kaifeng Academy of Agricultural Sciences, Kaifeng 475004, China.

**\*Corresponding author:**

Xuanqiang Liang,

E-mail: liangxuanqiang@gdaas.cn

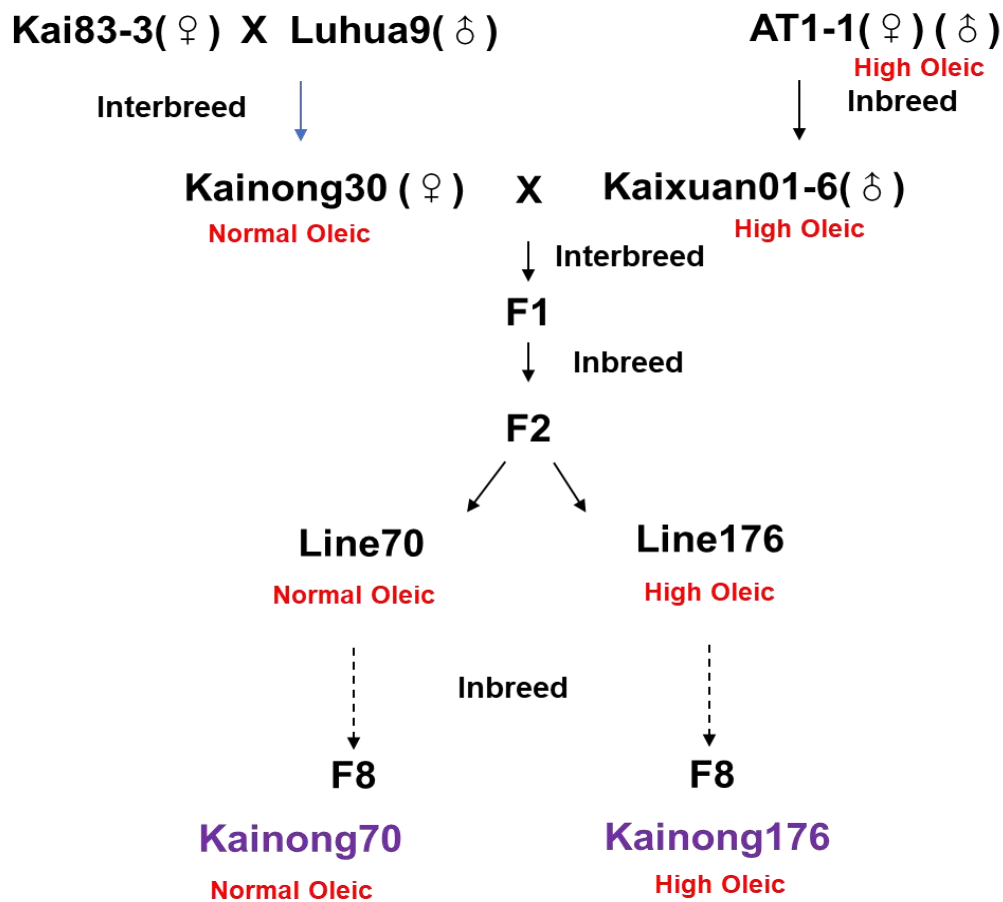

Figure S1. The breeding processes of normal- and high-oleic cultivars Kainong70 and Kainong176. Kai83-3(♀) intercrossed with Luhua9(♂) to cultivate the kainong30, Kaixuan01-6 selected from the inbreeding population of American introduced high-oleic peanut variety AT1-1(♀) (♂). Kainong30 (♀) intercrossed with Kaixuan01-6 (♂) to generate the F2 population, normal- and high-oleic line70 and 176 isolated from the F2 population, and self-fertilized to generate the normal-oleic cultivar Kainong70 and high-oleic cultivar Kainong176 until the stable F8 population. These varieties information provided by the website of [www.peanutdata.cn](http://www.peanutdata.cn).

>*FAD2-A* coding sequence in high-oleate cultivar kainong176

ATGGGAGCTGGAGGGCGTGCTACTAAGATTGAAGCTCAAAAGAAGCCTCTTTCAAGG  
GTTCCACATTCAAACCCCTCCATTTCAGTGTGGCCAACTCAAGAAAGCAATTCACCAC  
ATTGCTTTGAACGTTCTCTTTTCATATCATTCTCCTATGTTGTCTATGATCTCTTAGTGCC  
CTACTTACTCTTCTACATTGCCACCACTTATTTCCACAAGCTTCCATACCCATTTTCCTTC  
CTTGCTTGGCCAATCTATTGGGCCATCCAAGGCTGCATTCTCACTGGTGTGTTGGGTGAT  
TGCTCATGAGTGTGGCCACCATGCCTTCAGCAAGTACCAACTTGTTGATGACATGGTTG  
GTTTGACCCTTCACTCTTGA(375bp)CTATTAGTTCCTTATTTCTCATGGAAAATCAGCCA  
CCGCCGCCACCACTCCAACACCGGTTCCCTCGACCGCAACGAAGTGTGTTGTCCCAAAA  
CCAAAATCAAAGGTATCATGGTATAACAAGTACATGAACAATCCACCAGGGAGGGCTAT  
CTCCCTCTTCATCACACTCACACTAGGATGGCCCTTGTAAGTGGCCTTCAATGTTTCTGG  
CAGACCCTATGATAGATTTGCAAGCCACTATGACCCTTATGCTCCCATATACTCTAACAG  
GGAAAGGCTTCTAATTTATGTCTCAGATTTCATCTGTCTTTGCTGTAAACATATCTGCTATAT  
CACATAGCAACTTTGAAAGGTTTGGGTGGGTGGTATGTGTTTATGGGGTGCCATTGCT  
CATTGTGAATGGGTTTCTAGTTACCATAACCTATTTGCAGCACACACATGCATCATTGAC  
TCACTATGATTTCATCCGAATGGGACTGGTTAAGAGGAGCATTGGCAACAGTGGACAGA  
GATTATGGGATACTGAATAAGGCATTTTCATCATATAACTGATACGCATGTGGCTCATCATT  
TGTTCTCAACAATGCCTCATTACCATGCAATGGAAGCAACCAATGCAATAAAGCCAATA  
TTGGGTGATTACTACCAATTTGATGGCACCCCAGTTTACAAAGCATTGTGGAGAGAAGC  
CAAAGAGTGCCTCTATGTGGAGCCAGATGATGGAGCTTCTCAGAAGGGTGTTTATTGGT  
ACAAGAACAAGTTCTGA

>*FAD2-A* in normal-oleate cultivar kainong70

ATGGGAGCTGGAGGGCGTGCTACTAAGATTGAAGCTCAAAAGAAGCCTCTTTCAAGG  
GTTCCACATTCAAACCCCTCCATTTCAGTGTGGCCAACTCAAGAAAGCAATTCACCAC  
ATTGCTTTGAACGTTCTCTTTTCATATCATTCTCCTATGTTGTCTATGATCTCTTAGTGCC  
CTACTTACTCTTCTACATTGCCACCACTTATTTCCACAAGCTTCCATACCCATTTTCCTTC  
CTTGCTTGGCCAATCTATTGGGCCATCCAAGGCTGCATTCTCACTGGTGTGTTGGGTGAT  
TGCTCATGAGTGTGGCCACCATGCCTTCAGCAAGTACCAACTTGTTGATGACATGGTTG  
GTTTGACCCTTCACTCTTGTCTATTAGTTCCTTATTTCTCATGGAAAATCAGCCACCGCC  
GCCACCACTCCAACACCGGTTCCCTCGACCGGACGAAGTGTGTTGTCCCAAAACCAA  
AATCAAAGGTATCATGGTATAACAAGTACATGAACAATCCACCAGGGAGGGCTATCTCC  
CTCTTCATCACACTCACACTAGGATGGCCCTTGTAAGTGGCCTTCAATGTTTCTGGCAG  
ACCCTATGATAGATTTGCAAGCCACTATGACCCTTATGCTCCCATATACTCTAACAGGGA  
AAGGCTTCTAATTTATGTCTCAGATTTCATCTGTCTTTGCTGTAAACATATCTGCTATATCAC  
ATAGCAACTCTGAAAGGTTTGGGTGGGTGGTATGTGTTTATGGGGTGCCATTGCTCAT  
TGTGAATGGGTTTCTAGTTACCATAACCTATTTGCAGCACACACATGCATCATTGCCTCA  
CTATGATTTCATCCGAATGGGACTGGTTAAGAGGAGCATTGGCAACAGTGGACAGAGAT  
TATGGGATACTGAATAAGGCATTTTCATCATATAACTGATACGCATGTGGCTCATCATTGT  
TCTCAACAATGCCTCATTACCATGCAATGGAAGCAACCAATGCAATAAAGCCAATATTG  
GGTGATTACTACCAATTTGATGGCACCCCAGTTTACAAAGCATTGTGGAGAGAAGCCA  
AAGAGTGCCTCTATGTGGAGCCAGATGATGGAGCTTCTCAGAAGGGTGTTTATTGGTAC  
AAGAACAAGTTCTGA

|             |                                                                                                                            |      |      |      |      |      |      |      |      |      |      |      |      |      |  |  |  |
|-------------|----------------------------------------------------------------------------------------------------------------------------|------|------|------|------|------|------|------|------|------|------|------|------|------|--|--|--|
|             | 1                                                                                                                          | 10   | 20   | 30   | 40   | 50   | 60   | 70   | 80   | 90   | 100  | 110  | 120  | 130  |  |  |  |
| FAD2-AKM176 | ATGGAGCTGGAGGCGGTGTCTACTAGATTGAGCTCAAAAGAGCCCTTTTCAGGGTTCCACATTCARACCCCTCATTCAGTGTGGCCACTCAGAAAGCAATCCACCACATTGCTTTGACGCTT |      |      |      |      |      |      |      |      |      |      |      |      |      |  |  |  |
| FAD2-AKN70  | ATGGAGCTGGAGGCGGTGTCTACTAGATTGAGCTCAAAAGAGCCCTTTTCAGGGTTCCACATTCARACCCCTCATTCAGTGTGGCCACTCAGAAAGCAATCCACCACATTGCTTTGACGCTT |      |      |      |      |      |      |      |      |      |      |      |      |      |  |  |  |
| Consensus   | ATGGAGCTGGAGGCGGTGTCTACTAGATTGAGCTCAAAAGAGCCCTTTTCAGGGTTCCACATTCARACCCCTCATTCAGTGTGGCCACTCAGAAAGCAATCCACCACATTGCTTTGACGCTT |      |      |      |      |      |      |      |      |      |      |      |      |      |  |  |  |
|             | 131                                                                                                                        | 140  | 150  | 160  | 170  | 180  | 190  | 200  | 210  | 220  | 230  | 240  | 250  | 260  |  |  |  |
| FAD2-AKM176 | CTCTTTTCATATCAATTCCTATGTGTCTATGATCTCTTAGTGGCCACTTACTCTTACATTTGCCACCACTTATTTCCACAGCTTCATACCCATTTCTCTCTTGGCTTGGCCACTTATGGGC  |      |      |      |      |      |      |      |      |      |      |      |      |      |  |  |  |
| FAD2-AKN70  | CTCTTTTCATATCAATTCCTATGTGTCTATGATCTCTTAGTGGCCACTTACTCTTACATTTGCCACCACTTATTTCCACAGCTTCATACCCATTTCTCTCTTGGCTTGGCCACTTATGGGC  |      |      |      |      |      |      |      |      |      |      |      |      |      |  |  |  |
| Consensus   | CTCTTTTCATATCAATTCCTATGTGTCTATGATCTCTTAGTGGCCACTTACTCTTACATTTGCCACCACTTATTTCCACAGCTTCATACCCATTTCTCTCTTGGCTTGGCCACTTATGGGC  |      |      |      |      |      |      |      |      |      |      |      |      |      |  |  |  |
|             | 261                                                                                                                        | 270  | 280  | 290  | 300  | 310  | 320  | 330  | 340  | 350  | 360  | 370  | 380  | 390  |  |  |  |
| FAD2-AKM176 | CATCAGGCTGCATTTCTACTGGTGTGGGTGATTGCTCATGAGTGTGGCCACCATGCTTCAGCAGTACCACTTGTGATGACATGGTTGGTTTGACCTTCACTCTTGACTATAGTTCCTTAT   |      |      |      |      |      |      |      |      |      |      |      |      |      |  |  |  |
| FAD2-AKN70  | CATCAGGCTGCATTTCTACTGGTGTGGGTGATTGCTCATGAGTGTGGCCACCATGCTTCAGCAGTACCACTTGTGATGACATGGTTGGTTTGACCTTCACTCTTGACTATAGTTCCTTAT   |      |      |      |      |      |      |      |      |      |      |      |      |      |  |  |  |
| Consensus   | CATCAGGCTGCATTTCTACTGGTGTGGGTGATTGCTCATGAGTGTGGCCACCATGCTTCAGCAGTACCACTTGTGATGACATGGTTGGTTTGACCTTCACTCTTGACTATAGTTCCTTAT   |      |      |      |      |      |      |      |      |      |      |      |      |      |  |  |  |
|             | 391                                                                                                                        | 400  | 410  | 420  | 430  | 440  | 450  | 460  | 470  | 480  | 490  | 500  | 510  | 520  |  |  |  |
| FAD2-AKM176 | TTCTCATGAAATACGACCGCCGCCACCACTCCACACCGGTTCCCTCGACCGCAGCAGGTGTTTGTCCAAACCAAAATCAGAGTATCATGGTATACAGTACATGACAAATCCACCAGGGA    |      |      |      |      |      |      |      |      |      |      |      |      |      |  |  |  |
| FAD2-AKN70  | TTCTCATGAAATACGACCGCCGCCACCACTCCACACCGGTTCCCTCGACCGCAGCAGGTGTTTGTCCAAACCAAAATCAGAGTATCATGGTATACAGTACATGACAAATCCACCAGGGA    |      |      |      |      |      |      |      |      |      |      |      |      |      |  |  |  |
| Consensus   | TTCTCATGAAATACGACCGCCGCCACCACTCCACACCGGTTCCCTCGACCGCAGCAGGTGTTTGTCCAAACCAAAATCAGAGTATCATGGTATACAGTACATGACAAATCCACCAGGGA    |      |      |      |      |      |      |      |      |      |      |      |      |      |  |  |  |
|             | 521                                                                                                                        | 530  | 540  | 550  | 560  | 570  | 580  | 590  | 600  | 610  | 620  | 630  | 640  | 650  |  |  |  |
| FAD2-AKM176 | GGGCTATCTCCCTTTCATCACTCACTAGGATGGCCCTTGACTTGGCTTCATGTTTCTGGACGCCATGATAGATTGGACGCCATATGACCCCTATGCTCCCATATCTCTACAGGGA        |      |      |      |      |      |      |      |      |      |      |      |      |      |  |  |  |
| FAD2-AKN70  | GGGCTATCTCCCTTTCATCACTCACTAGGATGGCCCTTGACTTGGCTTCATGTTTCTGGACGCCATGATAGATTGGACGCCATATGACCCCTATGCTCCCATATCTCTACAGGGA        |      |      |      |      |      |      |      |      |      |      |      |      |      |  |  |  |
| Consensus   | GGGCTATCTCCCTTTCATCACTCACTAGGATGGCCCTTGACTTGGCTTCATGTTTCTGGACGCCATGATAGATTGGACGCCATATGACCCCTATGCTCCCATATCTCTACAGGGA        |      |      |      |      |      |      |      |      |      |      |      |      |      |  |  |  |
|             | 651                                                                                                                        | 660  | 670  | 680  | 690  | 700  | 710  | 720  | 730  | 740  | 750  | 760  | 770  | 780  |  |  |  |
| FAD2-AKM176 | AAGGCTTCTAATTTATGTCTCAGATTCATCTGCTTTGCTGTACATATCTGCTATATCAGATGACACTTGAAGGTTGGGTGGGTGATGTGTTTATGGGGTGCATTGCTCATTTGATGAGG    |      |      |      |      |      |      |      |      |      |      |      |      |      |  |  |  |
| FAD2-AKN70  | AAGGCTTCTAATTTATGTCTCAGATTCATCTGCTTTGCTGTACATATCTGCTATATCAGATGACACTTGAAGGTTGGGTGGGTGATGTGTTTATGGGGTGCATTGCTCATTTGATGAGG    |      |      |      |      |      |      |      |      |      |      |      |      |      |  |  |  |
| Consensus   | AAGGCTTCTAATTTATGTCTCAGATTCATCTGCTTTGCTGTACATATCTGCTATATCAGATGACACTTGAAGGTTGGGTGGGTGATGTGTTTATGGGGTGCATTGCTCATTTGATGAGG    |      |      |      |      |      |      |      |      |      |      |      |      |      |  |  |  |
|             | 781                                                                                                                        | 790  | 800  | 810  | 820  | 830  | 840  | 850  | 860  | 870  | 880  | 890  | 900  | 910  |  |  |  |
| FAD2-AKM176 | TTTCTAGTTACCATACCTATTTGCACACACATGATCATTTGCTCACTATGATTCATCCGATGGGACTGGTTAAGAGGAGCATTGGCAGCTGGACAGAGATTATGGGATCTGATAGGCAT    |      |      |      |      |      |      |      |      |      |      |      |      |      |  |  |  |
| FAD2-AKN70  | TTTCTAGTTACCATACCTATTTGCACACACATGATCATTTGCTCACTATGATTCATCCGATGGGACTGGTTAAGAGGAGCATTGGCAGCTGGACAGAGATTATGGGATCTGATAGGCAT    |      |      |      |      |      |      |      |      |      |      |      |      |      |  |  |  |
| Consensus   | TTTCTAGTTACCATACCTATTTGCACACACATGATCATTTGCTCACTATGATTCATCCGATGGGACTGGTTAAGAGGAGCATTGGCAGCTGGACAGAGATTATGGGATCTGATAGGCAT    |      |      |      |      |      |      |      |      |      |      |      |      |      |  |  |  |
|             | 911                                                                                                                        | 920  | 930  | 940  | 950  | 960  | 970  | 980  | 990  | 1000 | 1010 | 1020 | 1030 | 1040 |  |  |  |
| FAD2-AKM176 | TTCTCATATATCTGATACGATGTGGCTCATCTTTGTTCTCAACATGCTTCATACCATGATGAGGACCACTGATATAGGCCATATGGGTGATTACTACATTTGATGGCCGCCAGT         |      |      |      |      |      |      |      |      |      |      |      |      |      |  |  |  |
| FAD2-AKN70  | TTCTCATATATCTGATACGATGTGGCTCATCTTTGTTCTCAACATGCTTCATACCATGATGAGGACCACTGATATAGGCCATATGGGTGATTACTACATTTGATGGCCGCCAGT         |      |      |      |      |      |      |      |      |      |      |      |      |      |  |  |  |
| Consensus   | TTCTCATATATCTGATACGATGTGGCTCATCTTTGTTCTCAACATGCTTCATACCATGATGAGGACCACTGATATAGGCCATATGGGTGATTACTACATTTGATGGCCGCCAGT         |      |      |      |      |      |      |      |      |      |      |      |      |      |  |  |  |
|             | 1041                                                                                                                       | 1050 | 1060 | 1070 | 1080 | 1090 | 1100 | 1110 | 1120 | 1130 | 1140 |      |      |      |  |  |  |
| FAD2-AKM176 | TTTCAAGCATTTGGGAGAGGCCAAGAGTGCCTCTATGTGGGCGAGATGATGAGCTTCTCAGAGGGTGTATTATGGTACAGAACAGTTCTGA                                |      |      |      |      |      |      |      |      |      |      |      |      |      |  |  |  |
| FAD2-AKN70  | TTTCAAGCATTTGGGAGAGGCCAAGAGTGCCTCTATGTGGGCGAGATGATGAGCTTCTCAGAGGGTGTATTATGGTACAGAACAGTTCTGA                                |      |      |      |      |      |      |      |      |      |      |      |      |      |  |  |  |
| Consensus   | TTTCAAGCATTTGGGAGAGGCCAAGAGTGCCTCTATGTGGGCGAGATGATGAGCTTCTCAGAGGGTGTATTATGGTACAGAACAGTTCTGA                                |      |      |      |      |      |      |      |      |      |      |      |      |      |  |  |  |

>FAD2-B coding sequence in kainong176

ATGGGAGCTGGAGGCGTGTCACTAAGATTGAAGCTCAAAGAAGCCTCCTTCAAGG  
GTTCCACATTCAAACCCTCCATTTCAGTGTGGCCAACTCAAGAAGGCAATTCACCAC  
ATTGCTTTGAACGTTCTCTTTTCATATCATTCTCATATGTTGTCTATGATCTCTTAATGGCC  
TACTTACTCTTCTACATTGCCACCACCTTATTTCCACAAGCTTCCATACTCATTATCCTTCC  
TTGCTTGGCCAATCTATTGGGCCATCCAAGGCTGCACTTCTCACCGGTGTTTGGGTGATT  
GCTCATGAGTGTGGCCACCATGCCTTCAGCAAGTACCAACTTGTTGATGACATGGTTGG  
TTTGACCCCTTCACTCTTGTCTATTAGTTCCCTTATTTCTCGTGGAAAATCAGCCACCGCCG  
CCACCACTCCAACACAGGTTCCC**TCA**(442bp)GACCGCGACGAAGTGTTTGTCCCGAAA  
CCAAAATCAAAGGTATCATGGTATAACAAGTACATGAACAATCCACCAGGGAGGGCTAT  
TTCCCTTTTCATCACACCCACACTAGGATGGCCCTTGTACTTGGCCTTCAATGTTTCTGG  
CAGACCCTATGATAGATTTGCAAGCCACTATGACCCCTTATGCTCCCATATACTCTAACAG  
GGAAAGGCTTCTAATTTATGTCTCAGATTTCATCTGTCTTTGCTGTAACATATCTGCTATAT  
CACATAGCAACTTTGAAAGGTTTGGGTGGGTGGTATGTGTTTATGGGGTGCCATTGCT  
CATTGTGAATGGGTTTCTAGTTACCATAACCTATTTGCAGCACACACATGCAGCATTTGCC  
TCACTATGATTTCATCCGAATGGGACTGGTTAAGAGGAGCATTGGCAACAGTGGACAGA  
GATTATGGGATACTGAATAAGGCATTTTCATCATATAACTGATACGCATGTGGCTCATCATT  
TGTTCTCAACAATGCCTCATTACCATGCAATGGAAGCAACCAATGCAATAAAGCCAATA  
TTGGGTGATTACTACCAATTTGATGGCACCCCAAGTTTACAAAGCATTGTGGAGAGAAGC  
CAAAGAGTGCCTCTATGTGGAGCCAGATGATGGAGCTTCTCAGAAGGGTGTTTATTGGT  
ACAAGAACAAGTTCTGA

>FAD2-B coding sequence in kainong70

ATGGGAGCTGGAGGCGTGTCACTAAGATTGAAGCTCAAAGAAGCCTCCTTCAAGG  
GTTCCACATTCAAACCCTCCATTTCAGTGTGGCCAACTCAAGAAGGCAATTCACCAC

ATTGCTTTGAACGTTCTCTTTTCATATCATTCTCATATGTTGTCTATGATCTCTTAATGGCC  
TACTTACTCTTCTACATTGCCACCACTTATTTCCACAAGCTTCCATACCCATTTTCCTTCC  
TTGCTTGGCCAATCTATTGGGCCATCCAAGGCTGCATTCTCACCGGTGTTTGGGTGATT  
GCTCATGAGTGTGGCCACCATGCCTTCAGCAAGTACCAACTTGTTGATGACATGGTTGG  
TTTGACCCCTTCACTCTTGTCTATTAGTTCCTTATTTCTCATGGAAAATCAGCCACCGCCG  
CCACCACTCCAACACAGGTTCCCTCGACCGCGACGAAGTGTTTGTCCCGAAACCAAA  
ATCAAAGGTATCATGGTATAACAAGTACATGAACAATCCACCAGGGAGGGCTATTTCTC  
TTTTCATCACACTCACACTAGGATGGCCCTTGACCTGGCCTTCAATGTTTCTGGCAGA  
CCCTATGATAGATTTGCAAGCCACTATGACCCTTATGCTCCCATATACTCTAACAGGGAA  
AGGCTTCTAATTTATGTCTCAGATTCTATCTGTCTTTGCTGTAAACATATCTGCTATATCACA  
TAGCAACTTTGAAAGGTTTGGGTGGGTGGTATGTGTTTATGGGGTGCCATTGCTCATT  
GTGAATGGGTTTCTAGTTACCATAACCTATTTGCAGCACACACATGCATCATTGCCTCAC  
TATGATTTCATCCGAATGGGACTGGTTAAGAGGAGCATTGGCAACAGTGGACAGAGATT  
ATGGGATACTGAATAAGGCATTTTCATCATATAACTGATACGCATGTGGCTCATCATTTGTT  
CTCAACGATGCCTCATTACCATGCAATGGAAGCAACCAATGCAATAAAGCCAATATTGG  
GTGATTACTACCAATTTGATGGCACCCAGTTTACAAAGCATTGTGGAGAGAAGCCAA  
AGAGTGCCTCTATGTGGAGCCAGATGATGGAGCTTCTCAGAAGGGTGTTTATTGGTACA  
AGAACAAGTTCTGA

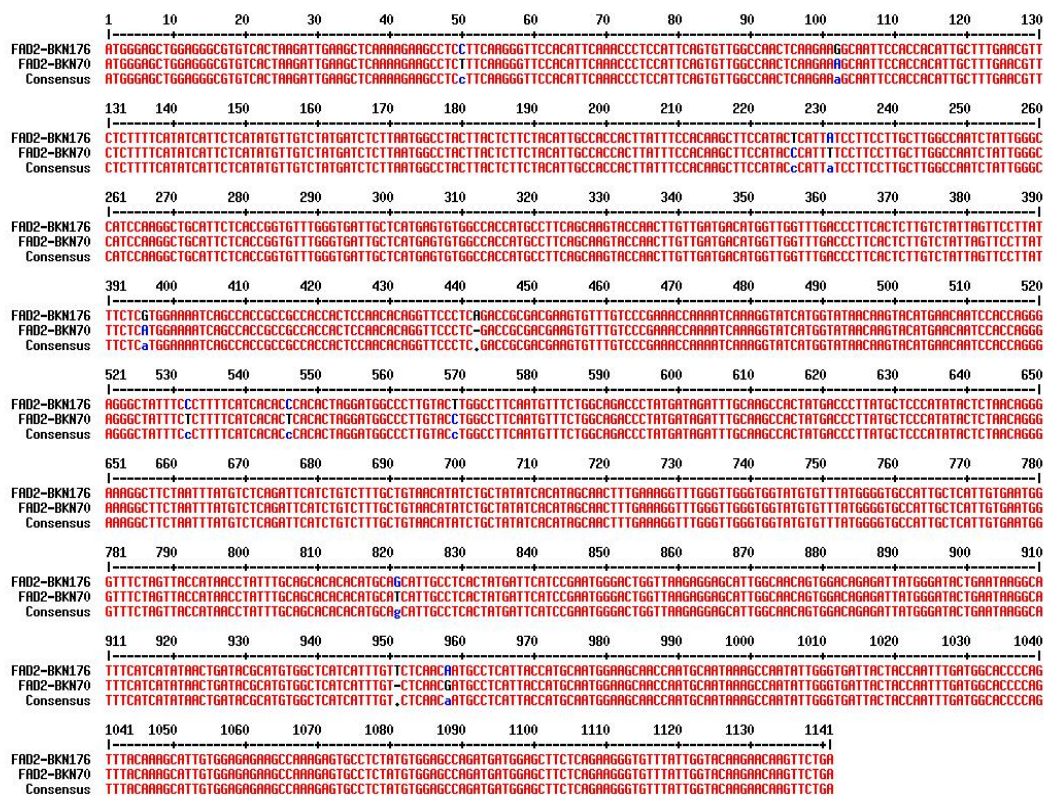

Figure S2. Coding sequence of *FAD2-A* and *FAD2-B* in kainong176 and kainong70.



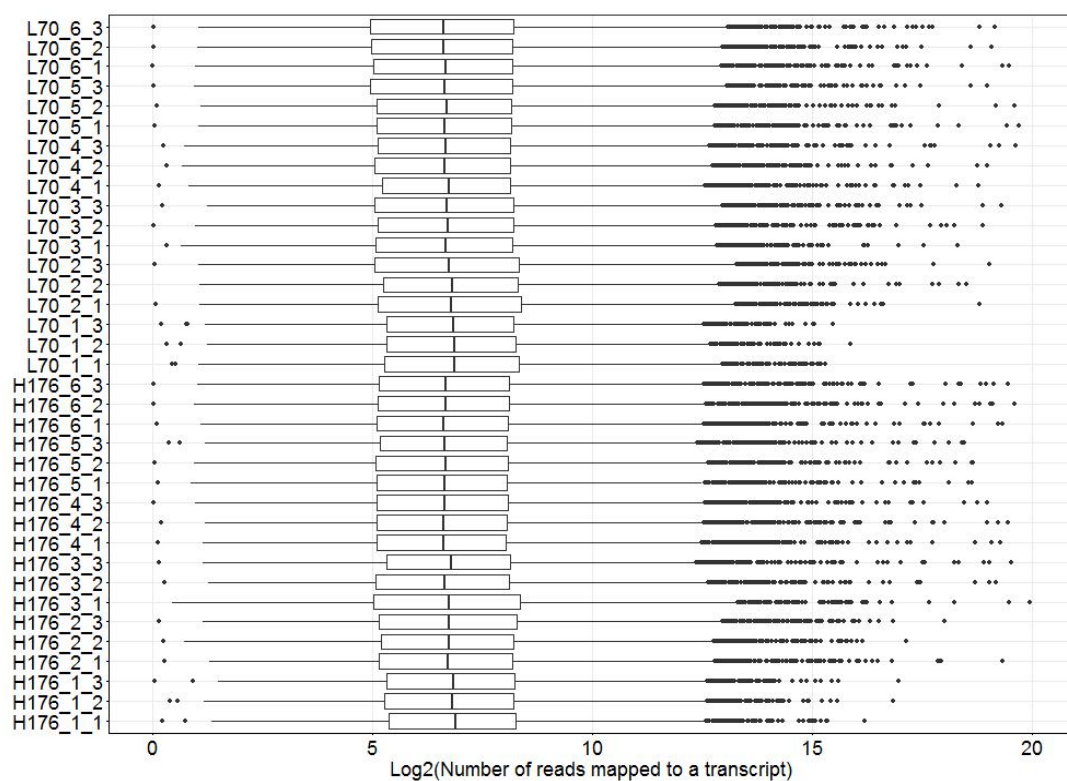

Figure S3. Statistical analysis of assembly reads mapped to the transcript.

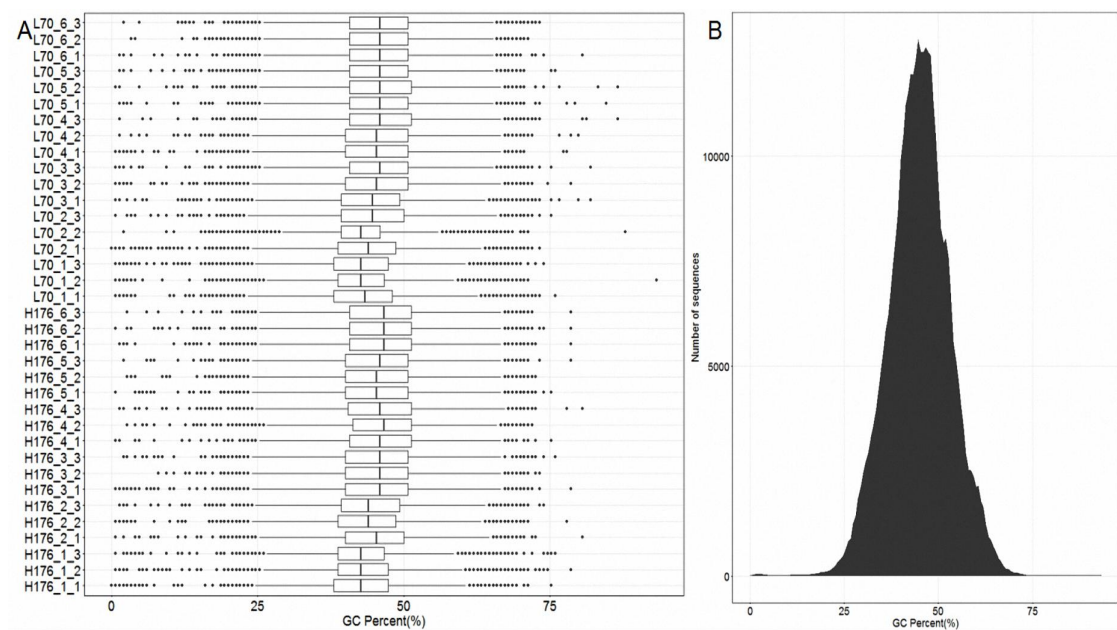

Figure S4. GC content analysis of peanut transcripts. A, Frequency of GC content of peanut transcripts. B, Distribution of GC content of transcripts for peanut transcriptome-seq.

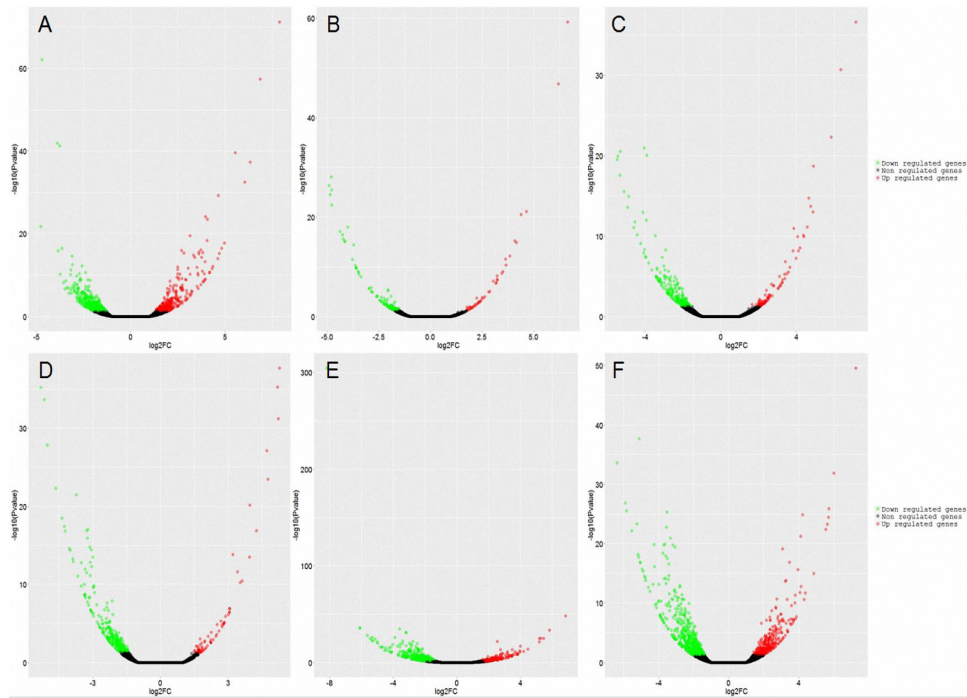

Figure S5. Volcano plot displayed the screening criteria of total DEGs at different seed development stages. A-F represented from 20DAF to 70DAF, respectively.



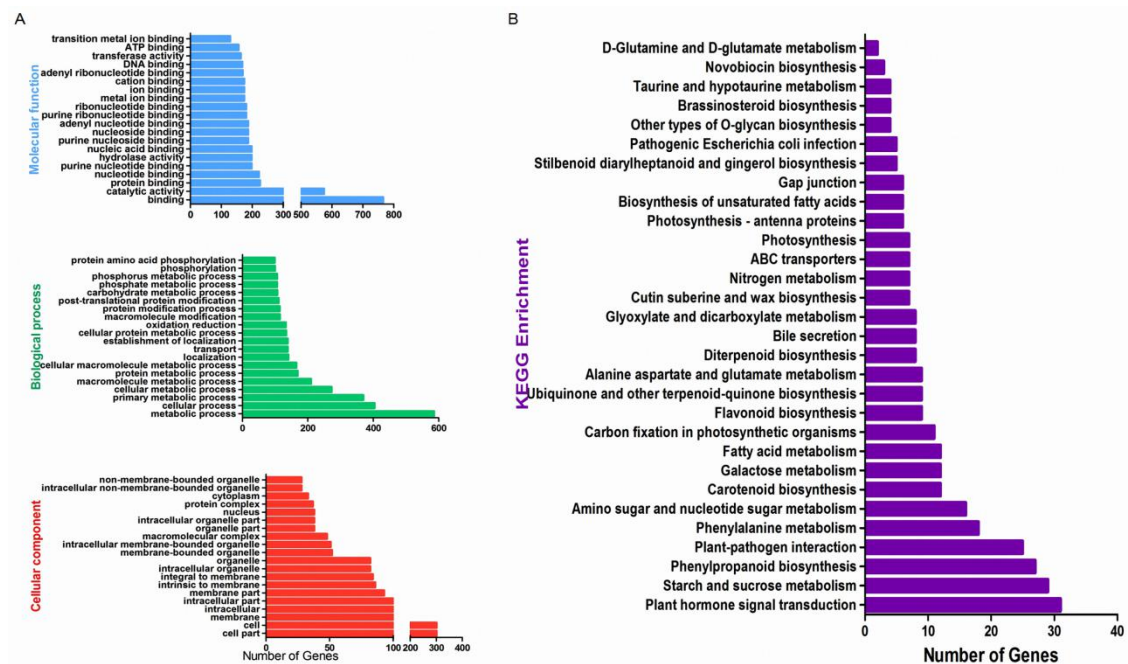

Figure S6. Bioinformatics and statistical analyses of differentially expressed genes. A, GO analysis of the total DEGs in molecular function, biological process, and cellular component, respectively (Top 20 terms). B, KEGG pathway enrichment analysis of DEGs at different seed developmental stages in H176 vs. L70 (Top 30 terms).

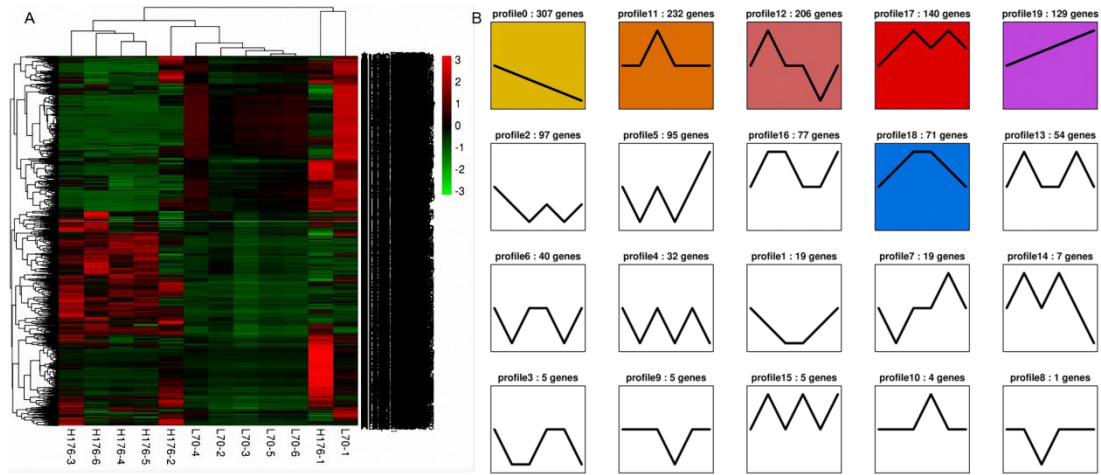

Figure S7. Expression analysis of DEGs between six developmental stages. A, Heatmap showing the relative expression of total DEGs at each stage in L70 and H176. B, Trend analysis of DEGs expression (20 trends). Colored block trend: significant enrichment trend ( $P < 0.05$ ). Without color trend: the enrichment of significant trends.

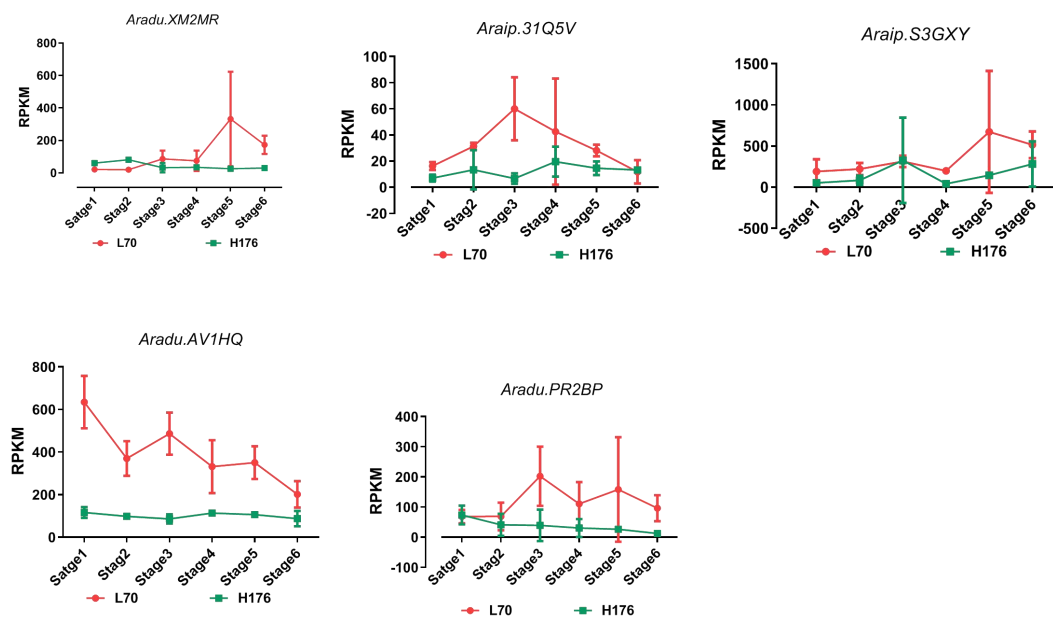

Figure S8. Relative expression levels of lipid DEGs measured by RNAseq.

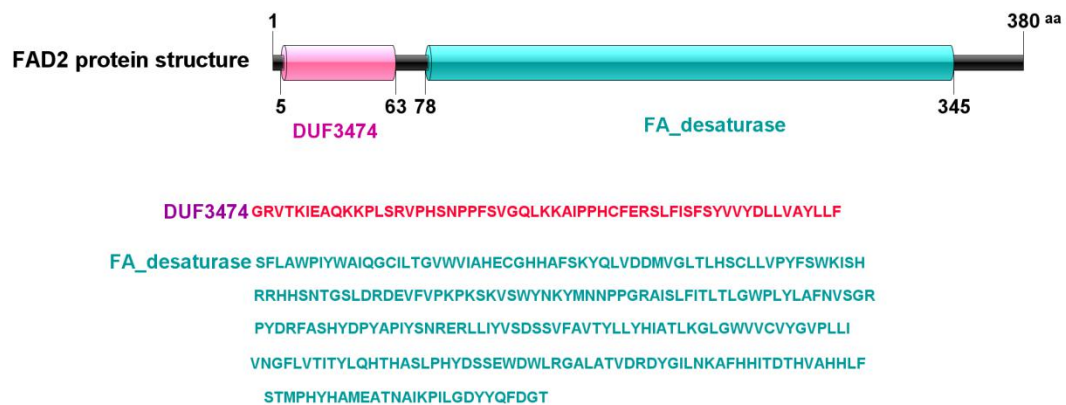

Figure S9. FAD2 protein structure in peanut. FAD2 protein structure predicted by the online database SMART (<http://smart.embl-heidelberg.de>). The FAD2 protein contains two major conserved domains DUF3474 (5-63aa) and FA-desaturase (78-345aa). DUF3474 indicated the domain of unknown function 3474, this domain is found in fatty acid desaturases (FADs), mainly from plants and fungi. FA indicated the fatty acid, and aa indicated the amino acid.

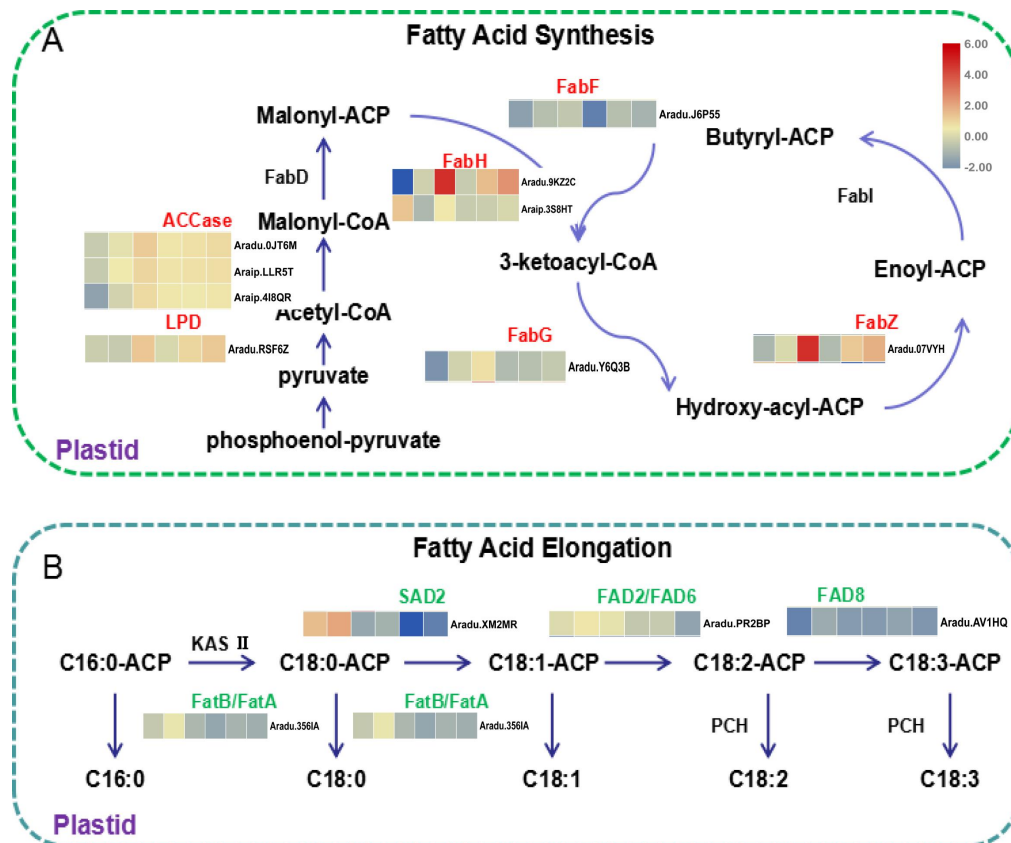

Figure S10. The contrapuntal patterns of lipid DEGs in developing high-oleic peanut seeds. A, identified lipid DEGs are annotated into fatty acid synthesis pathway, the icon is consisted of six blocks that represented six time points of seed development, the icons under the enzyme name show the number of RPKM corresponding to the relative expression of enzyme during high-oleic peanut seed development when compared with L70. B, lipid DEGs are annotated into fatty acid elongation pathway, the icons under the enzyme name show the number of RPKM corresponding to the relative expression of enzyme in H176. Enzyme name with green color indicates the down-regulated gene, and enzyme name with red color represents the up-regulated gene.

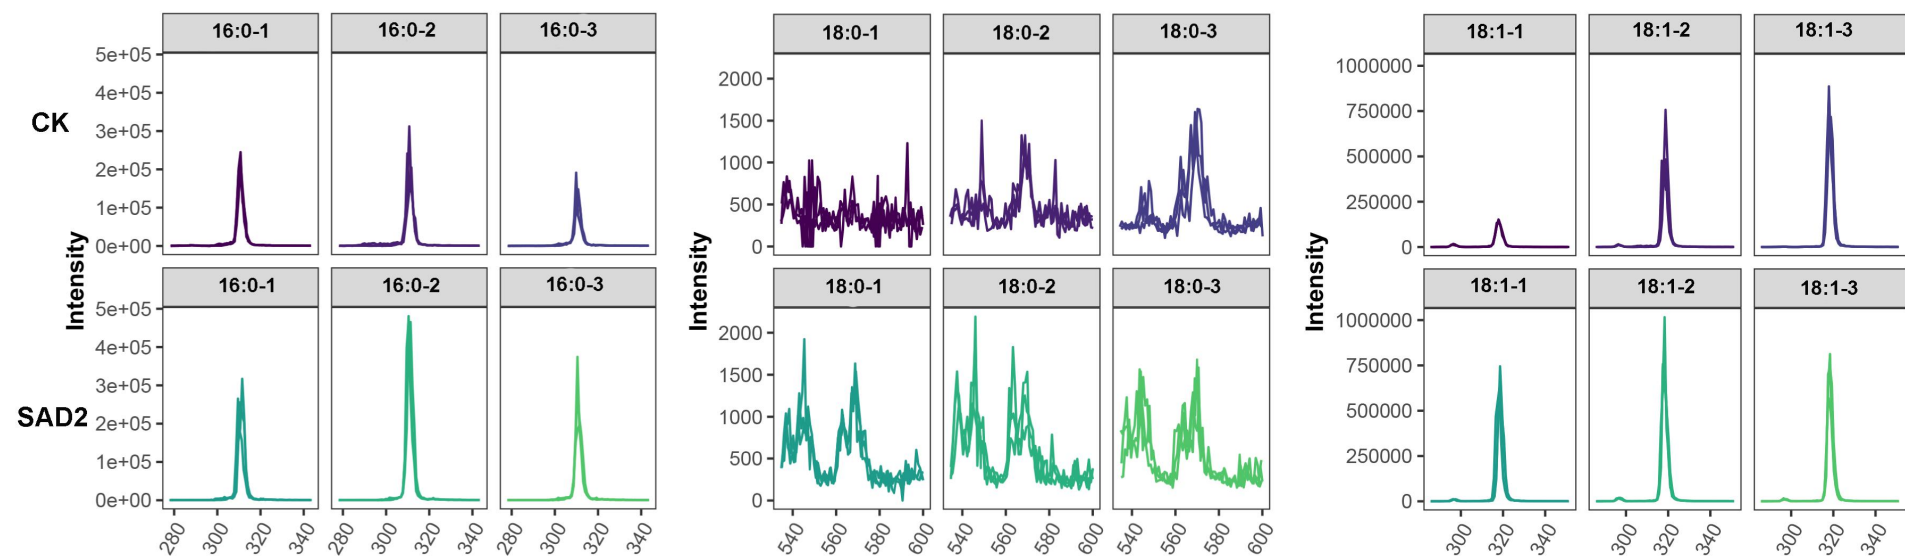

Figure S11. Mass spectrum of C16:0, C18:0, and C18:1 in ectopic expressed yeast cells of *SAD2* (*Aradu.XM2MR*), respectively.
